# Supplementary material
Source: ML conference proceedings conference paper supplement (https://proceedings.mlr.press/v28/yang13b.html)
Supplement: Supplementary file 1 [file yang13b-supp.pdf]

# Scalable Optimization of Neighbor Embedding for Visualization (Supplemental Document)

Brief description of the datasets

- Iris: the UCI *Iris* dataset.
- ORL: the AT&T ORL database of face images, each image of size  $92 \times 112$
- COIL: the *COIL-20* dataset from Columbia University Image Library, toy images of different angles, each image of size  $128 \times 128$ .
- Seg: the UCI *Image Segmentation* dataset, image patches from 7 outdoor images, originally with 19 high-level features.
- WebKB: the *WebKB4* dataset from CMU Text Learning group, text documents; 10,000 words with maximum information gain are preserved.
- 7Sectors: the *4 Universities* dataset from CMU Text Learning group, text documents classified to 7 sectors; 10,000 words with maximum information gain are preserved.
- OptDig: the UCI *optical recognition of handwritten digits*, originally with 64 dimensions.
- Reuters: the UCI *Reuters-21578* dataset, text documents, with 18933 words.
- RCV1: text documents from four classes, with 29992 words.
- Spam: A database for spam email classification, 448 numerical features for each email.
- PegDig: the UCI *pen-based recognition of handwritten digits* dataset, originally with 16 dimensions.
- Magic: the UCI *MAGIC Gamma Telescope Data Set*, 11 numerical features.
- Shuttle: the UCI *Statlog (Shuttle) Data Set*, 9 numerical features.

Table 1: Dataset statistics

| Dataset    | #samples | #classes | Domain    | Source |
|------------|----------|----------|-----------|--------|
| Iris       | 150      | 3        | biology   | UCI    |
| ORL        | 400      | 40       | image     | ORL    |
| COIL       | 1440     | 20       | image     | COIL   |
| Seg        | 2310     | 7        | image     | UCI    |
| WebKB      | 4196     | 4        | texts     | CMUTE  |
| 7Sectors   | 4556     | 7        | texts     | CMUTE  |
| OptDig     | 5620     | 10       | image     | UCI    |
| Reuters    | 8293     | 65       | texts     | UCI    |
| RCV1       | 9625     | 4        | texts     | RCV1   |
| Spam       | 10000    | 2        | email     | SPAM   |
| PenDig     | 10992    | 10       | image     | UCI    |
| Magic      | 19020    | 2        | telescope | UCI    |
| Shuttle    | 58000    | 7        | astronomy | UCI    |
| MNIST      | 70000    | 10       | image     | MNIST  |
| Covertypes | 581012   | 5        | forest    | UCI    |
| TIMIT      | 1345233  | 49       | speech    | TIMIT  |

- MNIST: handwritten digit images, each of size  $28 \times 28$ .
- Covertypes: the UCI *Covertypes Data Set*, 54 numerical features.
- TIMIT: phoneme classification for speech, from the *TIMIT database*. We used 39ms time window and MFCC features. 48 semantic classes plus a miscellaneous class.

Table 2: Data sources

|       |                                                                                                                                                       |
|-------|-------------------------------------------------------------------------------------------------------------------------------------------------------|
| UCI   | <a href="http://archive.ics.uci.edu/ml/">http://archive.ics.uci.edu/ml/</a>                                                                           |
| ORL   | <a href="http://www.cl.cam.ac.uk/research/dtg/attarchive/facedatabase.html">http://www.cl.cam.ac.uk/research/dtg/attarchive/facedatabase.html</a>     |
| COIL  | <a href="http://www.cs.columbia.edu/CAVE/software/softlib/coil-20.php">http://www.cs.columbia.edu/CAVE/software/softlib/coil-20.php</a>               |
| MNIST | <a href="http://yann.lecun.com/exdb/mnist/">http://yann.lecun.com/exdb/mnist/</a>                                                                     |
| WEBKB | <a href="http://www.cs.cmu.edu/afs/cs.cmu.edu/project/theo-20/www/data/">http://www.cs.cmu.edu/afs/cs.cmu.edu/project/theo-20/www/data/</a>           |
| CMUTE | <a href="http://www.cs.cmu.edu/~TextLearning/datasets.html">http://www.cs.cmu.edu/~TextLearning/datasets.html</a>                                     |
| RCV1  | <a href="http://www.ai.mit.edu/projects/jmlr/papers/volume5/lewis04a/">http://www.ai.mit.edu/projects/jmlr/papers/volume5/lewis04a/</a>               |
| SPAM  | <a href="https://noppa.aalto.fi/noppa/kurssi/t-61.3050/etusivu">https://noppa.aalto.fi/noppa/kurssi/t-61.3050/etusivu</a>                             |
| TIMIT | <a href="http://www ldc.upenn.edu/Catalog/CatalogEntry.jsp?catalogId=LDC93S1">http://www ldc.upenn.edu/Catalog/CatalogEntry.jsp?catalogId=LDC93S1</a> |
